# Supplementary material
Source: Springer Nature journal article supplement (https://www.springermedizin.de/resource/supplementary/12943_2013_1333_MOESM9_ESM.pdf/9552728)
Supplement: MOESM9 [file 9552728]

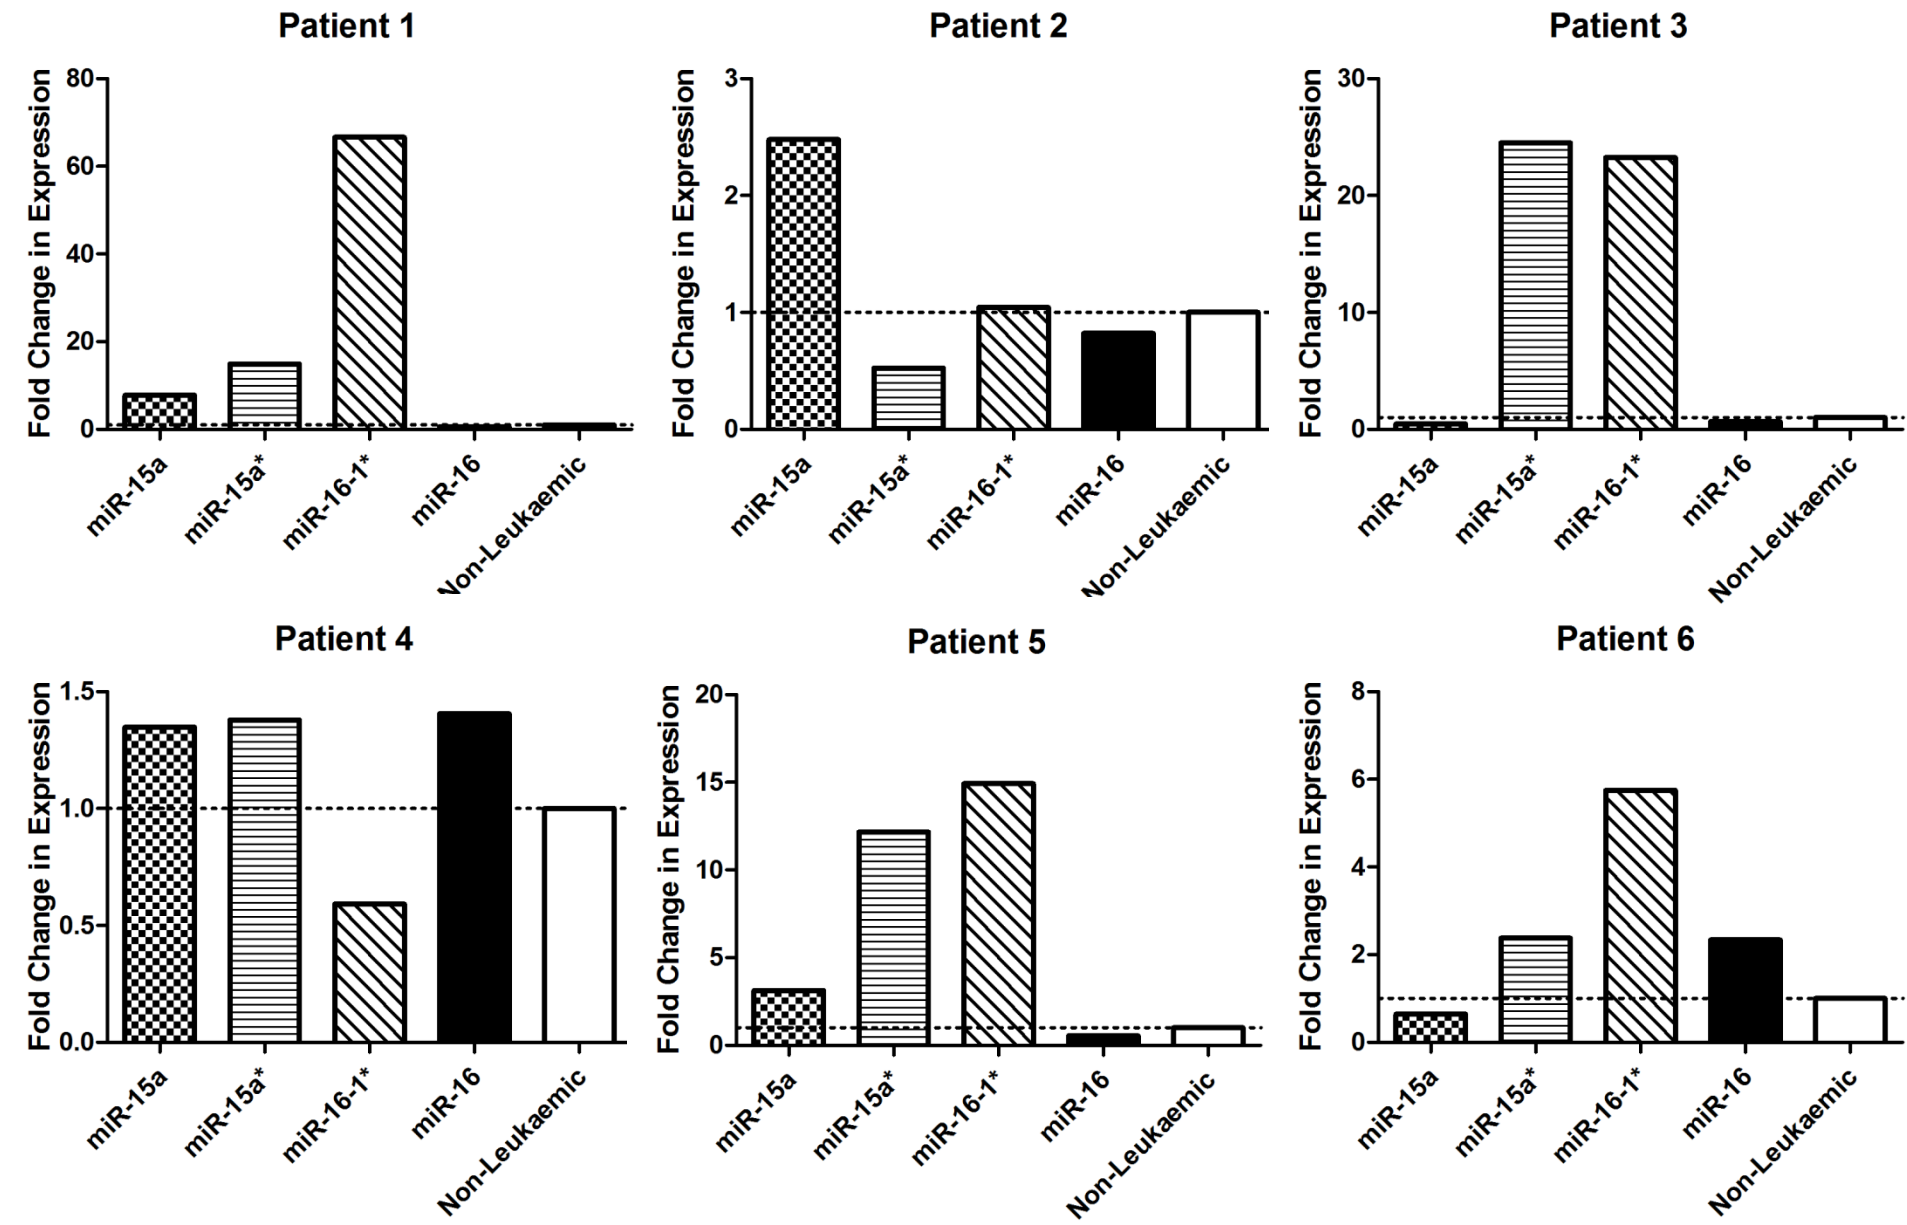

**Additional File 9: Comparison of individual patient miRNA miR-15a/16-1 cluster expression**

Examples of the individual patient leukaemic miRNA expression exhibited as linear fold change, normalized to miR-26b and RNU44, and compared to non-leukaemic expression. These values contributed to Figure 2, therefore elucidating some of the error bars for the AML cohort as a whole.
